# Phenotypic design choices for enhanced productivity in microbial chemical production processes

Kaushik Raj<sup>1,\*</sup>, Naveen Venayak<sup>1,\*</sup>, and Radhakrishnan Mahadevan<sup>1,2,\*\*</sup>

<sup>1</sup>Department of Chemical Engineering and Applied Chemistry, University of Toronto, Canada

<sup>2</sup>Institute of Biomaterials and Bioengineering, University of Toronto, Canada

\*These authors contributed equally

\*\*Corresponding author, [krishna.mahadevan@utoronto.ca](mailto:krishna.mahadevan@utoronto.ca)

## Abstract

Microbial metabolism can be harnessed to produce a broad range of industrially important chemicals. Often, three key process variables: **Titer**, **Rate** and **Yield (TRY)** are the target of metabolic engineering efforts to improve microbial hosts toward industrial production. Previous research into improving the TRY metrics have examined the efficacy of having distinct growth and production stages to achieve enhanced productivity. However, these studies assumed a switch from a maximum growth to a maximum production phenotype. Hence, the choice of operating points for the growth and production stages of two-stage processes is yet to be explored. The impact of reduced growth rates on substrate uptake adds to the need for intelligent choice of operating points while designing two-stage processes. In this work, we present a computational framework that scans the phenotypic space of microbial metabolism to identify ideal growth and production phenotypic targets, to achieve optimal TRY values. Using this framework, with *Escherichia coli* as a model organism, we compare two-stage processes that use dynamic pathway regulation, with one-stage processes that use static intervention strategies. Our results indicate that two-stage processes with intermediate growth during the production stage always result in the highest productivity. By analyzing the flux distributions for the production enhancing strategies, we identify key reactions and reaction subsystems that need to be downregulated for a wide range of metabolites in *E. coli*. We also elucidate the importance of flux perturbations that increase phosphoenolpyruvate and NADPH availability among strategies to design production platforms. Furthermore, reactions in the pentose phosphate pathway emerge as key control nodes that function together to increase the availability of precursors to most products in *E. coli*. Due to the presence of these common patterns in the flux perturbations, we propose the possibility of a universal production strain that enhances the production of a large number of metabolites.

**Keywords:** dynamic pathway engineering, two-stage processes, industrial bioprocesses, phenotypic choices, production platforms, substrate uptake effects

## 26 1 Introduction

27 The use of microbes for the production of chemicals through metabolic engineering has garnered significant  
28 interest in the past few decades. The naturally modular arrangement of metabolic networks makes micro-  
29 bial strains amenable to be used as chemical production platforms<sup>1</sup>. Metabolic networks have a bow-tie  
30 architecture which allows a large number of metabolites to be produced from a few universal precursors<sup>2</sup>.  
31 This has allowed us to successfully engineer microbes to be biocatalysts for the production of a wide range of  
32 commodity chemicals<sup>3,4</sup>, pharmaceuticals<sup>5,6</sup>, biofuels<sup>7,8</sup> and other natural and non-natural compounds<sup>9</sup>.  
33 While few such processes have been successful at an industrial scale<sup>10,11</sup>, large strain development costs  
34 and scale-up issues could deem many processes economically infeasible<sup>12,13</sup>. Given the cost of a target  
35 feedstock and product, the feasibility of industrial fermentation processes is typically determined by three  
36 process metrics - **Titer**: concentration of product at the end of a fermentation batch (given in *mmol/L* of  
37 product), **Rate/productivity**: the rate of product secretion (given in *mmol/L.h* of product), and **Yield**:  
38 the amount of product produced per unit amount of substrate (given in *mmol product/mmol substrate*)  
39 - collectively termed the **TRY** metrics<sup>14</sup>. Titer and yield affect the operating expenditure of the process  
40 by impacting product separation and substrate costs respectively, while productivity affects the capital  
41 expenditure by determining the scale of the reactor required. Microbial production processes undergo  
42 several rounds of strain, pathway and process optimization to reach acceptable TRY targets<sup>15,16</sup>.

43 Wild-type microbial strains have evolved to grow at maximal rates, directing little carbon flux towards  
44 production of target compounds<sup>17</sup>. Metabolic engineering attempts to change the operating point (or  
45 phenotype) of a strain to enhance target chemical production by throttling growth associated fluxes and/or  
46 tuning native metabolism to balance pathway energy and cofactor requirements. Given a stoichiometric  
47 model and substrate/nutrient uptake rates, the feasible range of chemical production in a microbial strain  
48 can be visualized using its production envelope which maps the maximum product flux at all possible growth  
49 rates of the microbe (Figure 1). Strain engineering strategies to improve TRY metrics can be broadly  
50 classified into static and dynamic pathway engineering strategies. Static pathway engineering involves  
51 making gene deletions that either couple the production of a target compound with the microorganism's  
52 growth<sup>18</sup> or, simply redirect more carbon flux through production pathways. These strategies are typically  
53 implemented as one-stage (OS) production processes where the strain remains at a single operating point  
54 throughout the course of the process (Figure 1a). Such processes result in a higher yield by ensuring high  
55 relative pathway flux. Recently, there has been an increased interest in dynamic pathway engineering, which  
56 involves temporally controlling carbon flux through growth and production pathways. This can be achieved  
57 through the use of biological logic or sensor and actuator systems composed of cellular components<sup>19-21</sup>.  
58 Such strategies are implemented as two-stage (TS) production processes which start with cells in their  
59 growth stage and at some point during the fermentation, production pathway genes are expressed to switch  
60 to the production stage (Figure 1b). Such a decoupling of growth and production stages is thought to reduce  
61 batch times by reaching maximal biomass concentrations faster and thereby increase productivity<sup>22,23</sup>.

62 While stoichiometric models are effective for determining relative production metrics such as yield,  
63 absolute metrics such as end-titer and productivity are also governed by variations in substrate uptake  
64 rates. However, metabolic models with constant substrate uptake rates are routinely used for simulations  
65 to monitor metabolite production rates at different phases of metabolism. The impact of reduced substrate  
66 uptake rate during stationary phase metabolism<sup>24</sup> is often overlooked while designing microbial production

67 processes. Studies have shown that the rate of glucose uptake varies by significant amounts depending on  
68 the genotype of the strain and phase of metabolism<sup>24–30</sup> (Supplementary Figure S1a). A drop in substrate  
69 uptake rate during the production stage of a TS process would result in reduced product flux and therefore,  
70 a lower productivity, defeating the purpose of such a process (dotted lines in Figure 1b). This effect was  
71 recently shown in a theoretical study that compared the performance of TS and OS processes for D-  
72 lactic acid production in *E. coli*<sup>31</sup>. This study showed that reduced substrate uptake rates can limit the  
73 use advantages of a TS process and there is a very narrow range of conditions where a TS process can  
74 outperform an OS process. They call for the use of methods that increase stationary phase substrate  
75 uptake, such as engineering ATP futile cycles to expand the range of conditions in which TS processes  
76 offer enhanced productivity. This study and many others consider only TS processes that switch from  
77 wild-type growth to a non-growing production phenotype during the stationary phase of metabolism have  
78 been studied. However, given the interplay between substrate uptake and growth rates, phenotypes with  
79 intermediate growth could hold significant value. Intermediate phenotypes have been examined in the past  
80 to identify operating points that result in balanced TRY values in OS processes<sup>32</sup>.

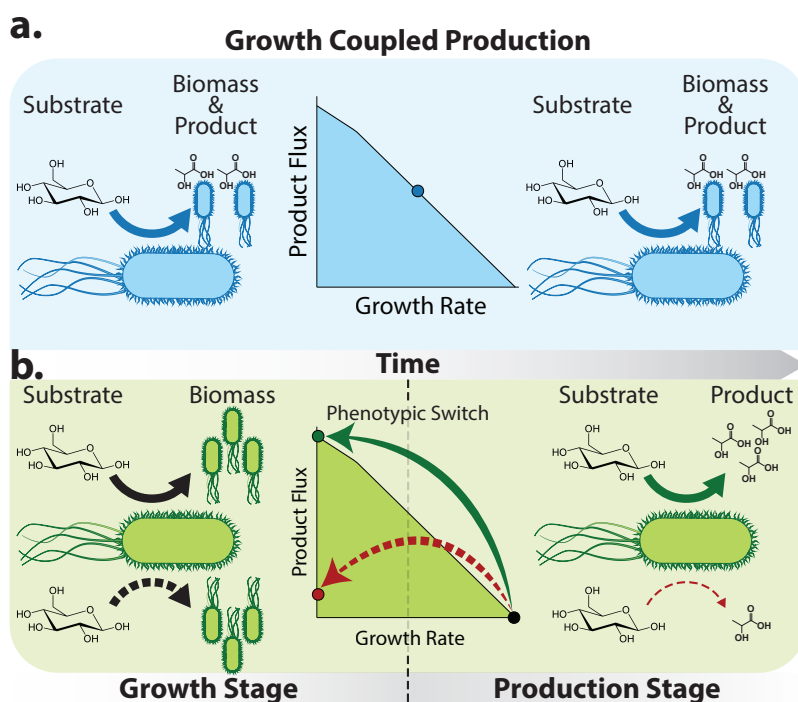

**Figure 1:** Static vs dynamic pathway engineering: Strain engineering strategies can be classified into **a.** Static engineering strategies where genetic perturbations that allow cells to grow and produce the target compound simultaneously (growth coupled production) are implemented. This enables the cells to produce the compound in a one-stage process. **b.** Dynamic engineering strategies where growth and production pathways are decoupled temporally. In such strategies, the process starts with a growth stage, accumulating biomass and switches over to a production stage to produce the target compound. Reduced substrate uptake during the production stage can result in lower product flux (dotted lines) than that expected assuming constant substrate uptake rates (solid lines). Hypothetical operating points for each production strategy are shown in the respective production envelopes.

81 In this work, we compare TS and OS production processes that make use of the entire range of feasible  
82 production operating points rather than those with maximum growth or maximum product yield. To this

83 end, we develop Two Step Dynamic Strain Scanning and Optimization (TS-DySScO), a modular compu-  
 84 tational framework to compare microbial production processes. TS-DySScO uses TS dynamic flux balance  
 85 analysis to determine the process metrics obtainable using hypothetical operating points calculated within  
 86 the solution space of a microbe’s metabolic model. With this information, the framework can determine the  
 87 best process type and phenotypic choices that result in the maximum value of a predetermined objective.  
 88 We use TS-DySScO to discover enhanced TS processes that result in high productivity while considering  
 89 the substrate uptake effects of reduced growth. We also identify flux perturbations that occur consistently  
 90 in production strategies for all natural products, giving rise to the possibility of a universal chassis for  
 91 metabolic engineering.

## 92 2 Materials & Methods

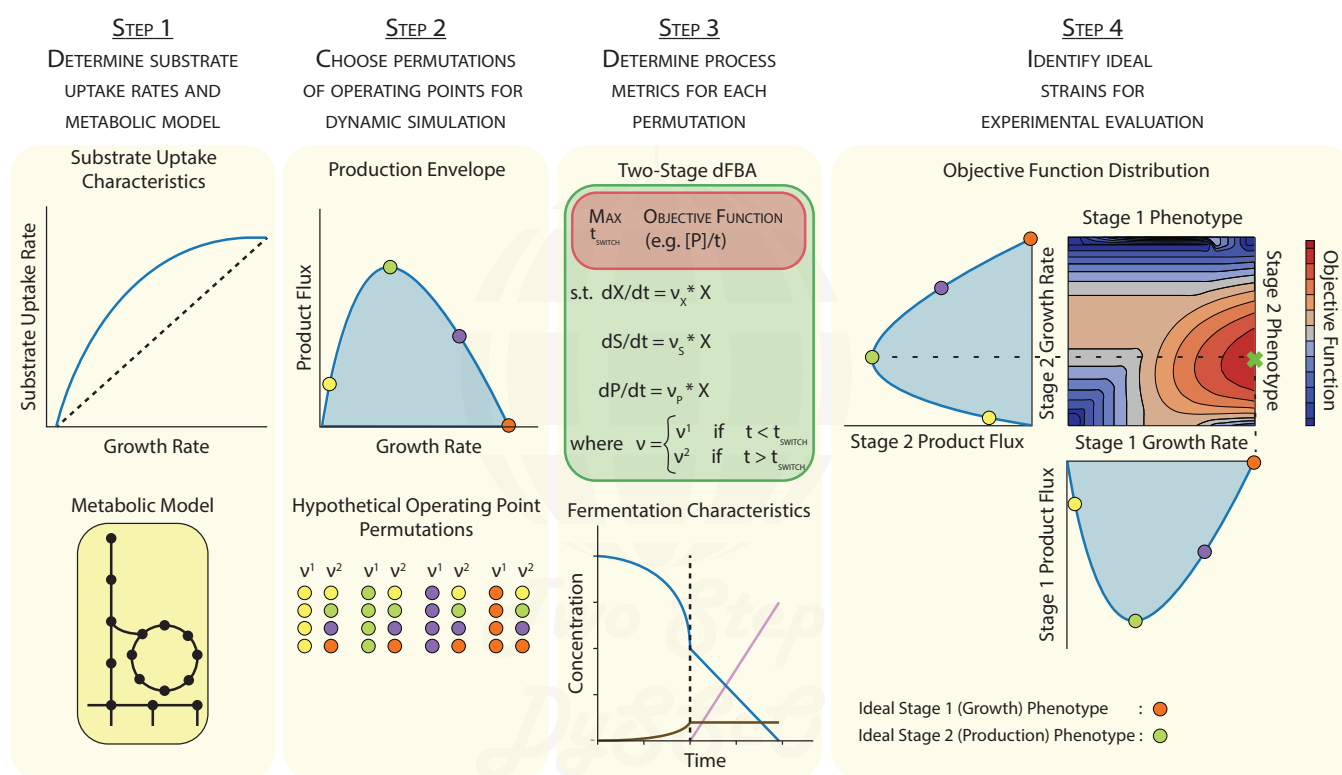

**Figure 2:** TS-DySScO workflow: **Step 1** - A metabolic reconstruction of the microorganism and an approximation of the substrate uptake characteristics at different growth rates are given as inputs to the formulation. Currently, TS-DySScO accepts all COBRA compatible metabolic models and any mathematical function to model substrate uptake variations. **Step 2** - A realistic production envelope is generated for the product of interest. This entails maximizing the product flux at all possible growth rates of the organism. A user defined number of operating points are chosen on the production envelope and all possible permutations of these operating points are determined for two-stage analysis. **Step 3** - A two-stage dynamic flux balance analysis that maximizes a user-defined objective function is conducted to determine the process metrics and fermentation characteristics for each permutation of operating points. **Step 4** - A distribution of process metrics for all two-stage processes is plotted and the optimal production strain is identified. The optimal phenotype for each stage has been projected onto the respective production envelope.

## 93 2.1 TS-DySScO formulation

94 The TS-DySScO workflow formulated in this study is briefly summarized in Figure 2 and described below.

### 95 2.1.1 Establishing substrate uptake characteristics

96 The first step towards thoroughly analyzing the performance of the production strategies using a metabolic  
97 model is establishing a relationship between the growth rate and the rate of substrate uptake in the organism  
98 being studied. There are several studies that have attempted to elucidate the relationship between substrate  
99 uptake and growth rates in *E. coli*. Many of these have examined this relationship using a chemostat under  
100 glucose limiting conditions<sup>33–36</sup>. Under these conditions, the rate of glucose uptake is limited by the dilution  
101 rate prevailing in the reactor and not by the effects of genetic perturbations in the cells. Therefore, for our  
102 analysis we only consider studies with batch fermentations under glucose excess conditions<sup>24–30</sup>.

$$q_s = q_{s,min} + (q_{s,max} - q_{s,min}) * \left( -1 + \frac{2}{(1 + e^{-K_{uptake} * \mu})} \right)$$

where

$q_{s,min}$  : substrate uptake rate at zero-growth rate

$q_{s,max}$  : substrate uptake rate at maximum growth rate

$K_{uptake}$  : substrate uptake parameter

(Eq. 1)

103 We chose to use a logistic curve that spans between the minimum recorded glucose uptake rate dur-  
104 ing stationary phase and the maximum glucose uptake rate used in the metabolic model, to estimate  
105 the substrate uptake rates at various growth rates (Eq. 1). We have presented a more detailed analy-  
106 sis of the relationship between substrate uptake rate and growth rate in the supplementary information  
107 (Supplementary text 1.1, Figure S1b).

### 108 2.1.2 Defining hypothetical operating points

109 The next step is to determine all hypothetical operating points of interest using a metabolic model. In this  
110 study, we refer to a metabolic mode of an organism, represented by a unique combination of the possible  
111 growth and product secretion rates within the solution space of its metabolic model, as an operating point  
112 or ‘phenotype’. For a user-defined number of points between the minimum and maximum growth rates of  
113 the organism as determined from the metabolic model, we derive the corresponding substrate uptake rates  
114 using the relationship established in the previous step. At each of these points, by constraining the growth  
115 and substrate uptake reactions to the required values and maximizing the secretion rate of the metabolite  
116 of interest, we obtain the hypothetical operating points of interest for examination.

### 117 2.1.3 Two-stage dynamic flux balance analysis

118 Dynamic flux balance analysis (dFBA)<sup>37</sup> can be used to obtain process metrics for a fermentation process  
119 by keeping track of substrate, biomass and product concentrations over the course of a fermentation batch,  
120 provided that initial concentrations of these species are known. This is done by using ordinary differential  
121 equations to simulate changes in the concentration of relevant species using their fluxes obtained from a  
122 metabolic model. Here, we modify the dFBA formulation to allow for phenotype switching between the

123 two stages of a TS fermentation process (Eq. 2b-d). We do this by using distinct of biomass, substrate and  
124 product fluxes in the dFBA equations during the growth and production stages. By repeating this process  
125 with all possible permutations of the hypothetical operating points as growth and production phenotypes,  
126 we obtain process metrics for all possible TS processes.

$$\max_{t_{switch}} f(\mathbf{TRY}) \quad (\text{Eq. 2a})$$

such that

$$\frac{d[X]}{dt} = \nu_{n,X} * [X] \quad (\text{Eq. 2b})$$

$$\frac{d[S]}{dt} = \nu_{n,S} * [X] \quad (\text{Eq. 2c})$$

$$\frac{d[P]}{dt} = \nu_{n,P} * [X] \quad (\text{Eq. 2d})$$

where

$$n = \begin{cases} 1 & \text{if } t \leq t_{switch} \\ 2 & \text{if } t > t_{switch} \end{cases}$$

#### 127 2.1.4 Optimizing metabolite production strategy

128 The time of switching between the two stages is an additional variable that affects the concentration of  
129 the species in the dFBA formulation and therefore, the process metrics that determine the performance  
130 of each TS process. In order to obtain the best fermentation metric for each combination of operating  
131 points, we formulate an optimization problem that varies the switching time ( $t_{switch}$ ) to maximize a desired  
132 objective function (Eq. 2a). This can be the titer, rate, yield or a function of these metrics. We can  
133 then plot a distribution of the process metrics for each permutation to identify the optimal combination of  
134 operating points. Following this, the desirable operating point combinations can be chosen for experimental  
135 validation. For this study, we used the productivity of a fermentation process as the objective function.

#### 136 2.1.5 Packaging and availability

137 The TS-DySScO framework is written as a python package that accepts COBRApy<sup>38</sup> compatible metabolic  
138 models. The modular nature of this package allows users to select the metabolic model, fermentation start  
139 parameters and, substrate uptake characteristics with ease. In order to reduce run times, we allowed for  
140 the optimization and dFBA calculations shown in Eq. 2 to be run parallelly on multi-core and multi-  
141 processor systems. The switch time optimization problem was implemented using the COBYLA method  
142 in the optimization package of scipy. The TS-DySScO framework can be installed and run on any system  
143 with a working Python 3 distribution. The framework, along with installation instructions are available on  
144 GitHub (<https://github.com/lmse/tsdyssco>). The code used to perform the various analyses described  
145 in this article are available at [https://github.com/lmse/phenotypic\\_design](https://github.com/lmse/phenotypic_design).

## 146 2.2 Implementation

147 All analyses were conducted using the COBRApy<sup>38</sup> and Cameo<sup>39</sup> packages on a Python 3.7 distribution.  
 148 *E. coli*'s genome scale metabolic reconstruction - iJO1366<sup>40</sup> was used to perform all simulations to compare  
 149 the two fermentation strategies. Unless otherwise specified, fermentation batches were started with 500  
 150 mM ( $\approx 90$  g/L) of D-glucose as the substrate and 0.05 g/L of biomass. These values are in the range of  
 151 required substrate and biomass concentrations to achieve acceptable TRY targets<sup>15</sup>. Flux distributions for  
 152 best performing phenotypes in each fermentation strategy were obtained by constraining growth, substrate  
 153 uptake and product secreting reactions to required values and performing a parsimonious flux balance anal-  
 154 ysis (pFBA)<sup>41</sup> on the metabolic model using the IBM ILOG CPLEX (v12.9) solver. Data visualization  
 155 was performed using the plotly package.

156

## 157 3 Results & Discussion

### 158 3.1 Case Study: Production of D-Lactic Acid in *E. coli*

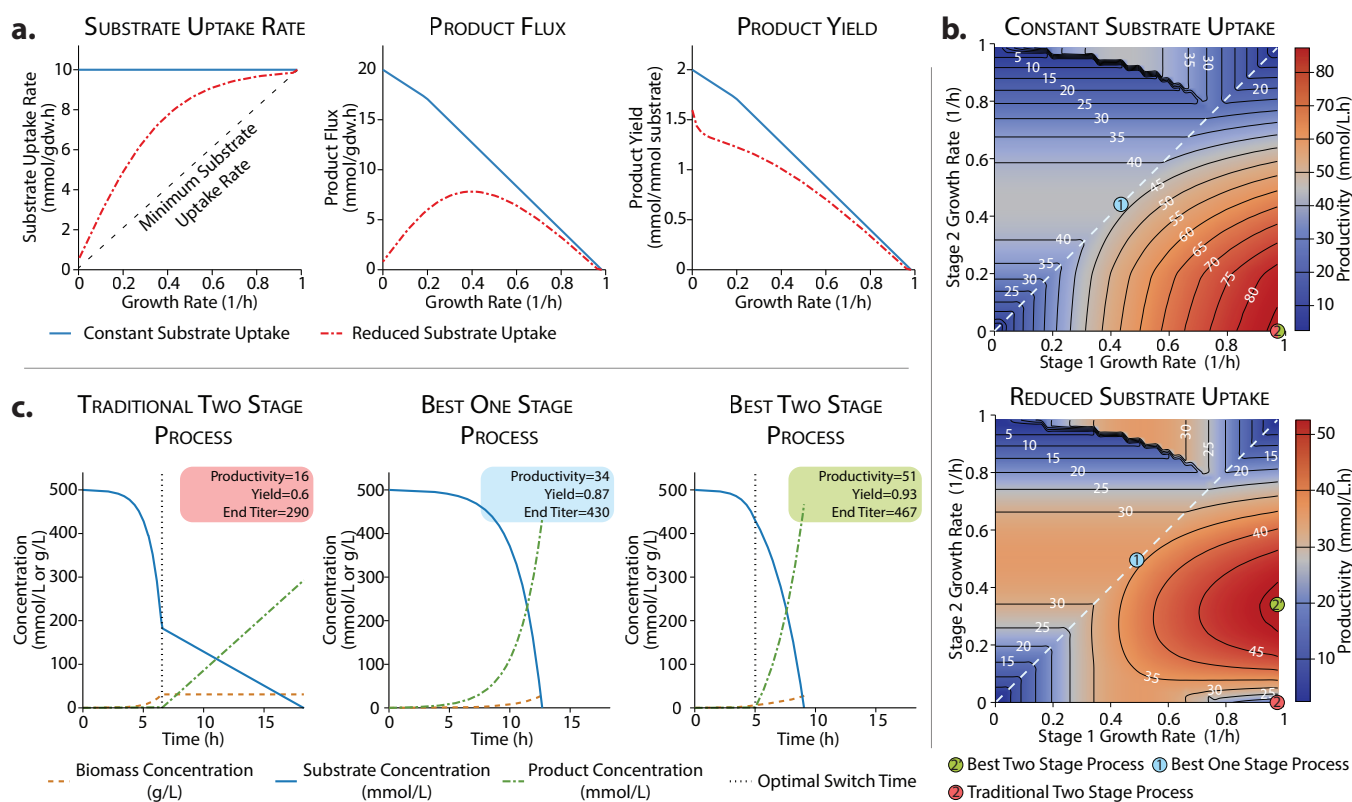

**Figure 3:** TS-Dyssco implemented for D-lactic acid production in *E. coli*: **a.** substrate uptake rates, product flux and product yields obtained using the iJO1366 reconstruction of *E. coli* assuming constant and reduced substrate uptake rates. **b.** Productivity distribution for TS and OS processes in *E. coli* assuming constant and reduced substrate uptake rates. Isoclines on the distributions show phenotypes with the same productivity levels. **c.** Fermentation profile for various production strategies assuming reduced substrate uptake rates.

159 We applied the newly formulated TS-DySScO framework to predict strategies that maximize the pro-

ductivity of D-lactic acid production in *Escherichia coli*, starting with 500 mM of glucose as substrate and 0.05 g/L biomass. First, we examined the process under constant substrate uptake conditions i.e. assuming that the substrate uptake is unaffected by growth and other metabolic perturbations (Figure 3a). In these conditions, since the product flux and yield are highest when there is no growth, the best TS process for productivity is the traditional TS process, where the strain is allowed to switch from a maximum growth (wild-type) to a zero-growth phenotype (Figure 3b). Industrial fed-batch processes, where production pathway genes are induced upon reaching stationary phase and substrate is added slowly, fall under this category. As expected, the traditional TS process has a much higher productivity than the best OS process.

However, an impediment in growth rate either due to reaching stationary phase or rewiring of metabolism has been shown to alter substrate uptake rates<sup>24-30</sup>. If these effects are considered, the product flux in a non-growing strain is heavily impacted (shown as red dashed lines in Figure 3a). This makes a non-growing phenotype during the second stage of a TS process ineffective. We can observe this in Figures 3b,c where the traditional TS process has very low productivity - among the lowest of any possible process. As observed in a previous study<sup>31</sup>, many OS processes (shown as dashed lines in Figure 3b) have a higher productivity than the traditional TS process. However, a fair evaluation of two-stage strategies should include the entire available phenotypic space. Even under reduced substrate uptake conditions, there are several TS processes that have a higher productivity than the best performing OS process. These processes can be achieved by allowing the strain to grow at a reduced rate during the production stage, rather than completely eliminating growth. The switch time optimization formulation results in earlier switching between the phenotypes when the strain is allowed to grow during the production stage (Figure 3c and Supplementary Figure S2). The TRY metrics attained in the best TS process assuming reduced substrate uptake is higher than that of the OS process with the highest productivity (Figure 3b and Supplementary Figure S3). The best TS process predicted requires the strain to be able to dynamically switch from wild-type growth to a phenotype with intermediate growth and production (growth coupled production). However a process with the highest productivity may not be the most economically optimal choice due to variations in substrate and product prices. The process metric distributions can be collectively used to choose phenotypes for TS processes depending on substrate and product prices prevailing at a particular time.

### 3.2 TS processes have highest productivity for all natural metabolites in *E. coli*

Having established that TS processes result in a higher D-lactate productivity, we wished to examine if this trend held true for other native metabolites in *E. coli*. We anticipated that the different production flux profiles for each product would result in variations in the process metrics. Hence, we used TS-DySScO with the fermentation start parameters previously described, to predict process optimality for 70 native exchange metabolites in the iJO1366 reconstruction of *E. coli*'s metabolism. The best TS process has the highest productivity for all products analyzed, with the OS process and traditional TS process trailing behind (Figure 4). Surprisingly, the best TS process outperforms OS processes even if substrate uptake rates are assumed to be constant for the OS process.

In general, products with more carbon atoms have a lower molar productivity. However, two products, namely 5-methylthioribose and spermidine have unusually low productivities, which will be examined in



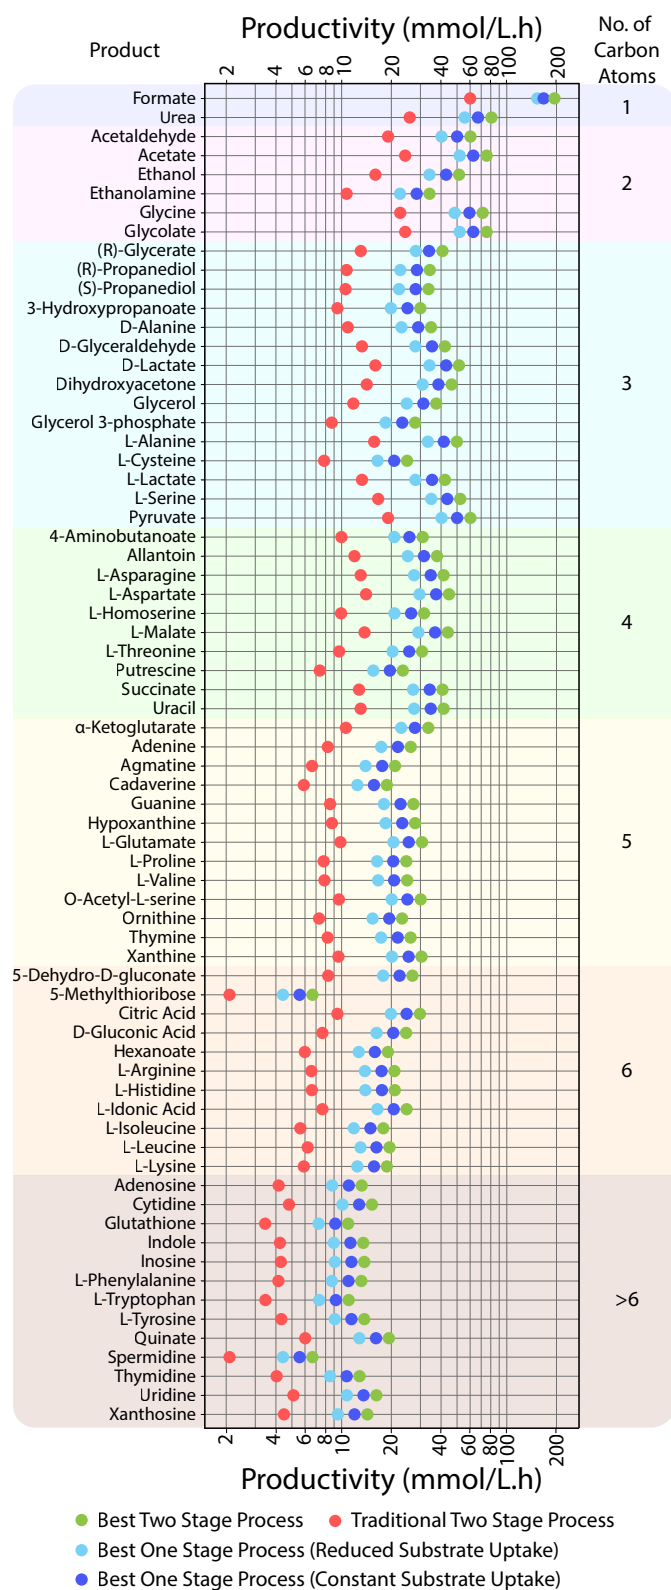

**Figure 4:** Productivity for exchange metabolite production in *E. coli*: TS-DySScO was used to simulate the production of all exchange metabolites in the iJO1366 reconstruction of *E. coli*, ordered by the number of carbon atoms in the product. The optimized two stage process always results in the highest productivity.

200 later sections. The best TS processes also have a higher yield and end-titer than their OS counterparts  
201 (Supplementary Figure S6). Only if the substrate uptake effects of growth rate are neglected, OS processes  
202 have a higher yield and end-titer than the best TS processes. The traditional TS processes have very  
203 stunted productivities, yields and end-titers for all the exchange metabolites when substrate uptake rates  
204 is reduced, consistent with the previous study for D-lactic acid<sup>31</sup>.

205 Upon examining the best TS processes predicted by TS-DySScO, we found that all of them had the  
206 same phenotype during the growth stage - wild-type growth. These processes varied in phenotype only  
207 during the production stage, where an intermediate growth phenotype resulted in the highest productivity.  
208 Similarly, OS processes with the highest productivity are those with an intermediate growth rate and  
209 have one growth-coupled production stage. Hence, it is possible to compare the two process types at  
210 every operating point in the production envelope during the production stage for all possible substrate  
211 uptake rates. This allows us to determine the threshold substrate uptake rate that a strain would need  
212 to achieve in order to make the TS process better than the OS process. Since the logistic curve used to  
213 model substrate uptake variation is merely an approximation, this analysis would help in determining the  
214 best process type under various substrate uptake rate assumptions. If a TS process is compared to an  
215 OS process with the same production stage operating point, the TS process has a higher productivity at  
216 all substrate uptake rates (Supplementary Figure S7a). Even if we compare the TS processes to the best  
217 performing OS process assuming constant substrate uptake, there is a large range of substrate uptake rates  
218 where a better performing TS process can be found (Supplementary Figure S7b). The threshold substrate  
219 uptake rate that needs to be crossed to make a TS process is given by the contour line that equals zero  
220 in Figure S7b. This analysis can be used as a general guideline to decide the process type for production  
221 when substrate uptake rates are exactly known for a given production strain.

### 222 **3.3 Commonalities in flux perturbations hint towards a universal production pheno-** 223 **type**

224 While it is clear that TS processes have optimal productivity, it would be useful to determine how such  
225 processes can be physically realized. Hence, we wished to examine the flux perturbations required to  
226 achieve the various production strategies for each of the exchange metabolites analyzed in the previous  
227 section. This was done by using pFBA to obtain the flux distributions required to achieve the various  
228 phenotypes for each of the process types. As mentioned earlier, both the best and traditional TS processes  
229 use wild-type growth as the phenotype in the first stage. Therefore, using the wild-type flux distribution  
230 as a reference, we examined how many reactions would need to be perturbed in each of the strategies, and  
231 classified each perturbed reaction/flux based on whether it was switched on, switched off, upregulated,  
232 downregulated or reversed (Supplementary Figures S8,S9, and S10).

233 A very large number of fluxes (>200) need to be modified to achieve any of the target phenotypes  
234 predicted by TS-DySScO. It appears that for all process types, products with fewer carbon atoms require  
235 more reactions to be turned on/off compared to larger products. Among these,  $\alpha$ -ketoglutarate is an outlier,  
236 being a 5-carbon compound requiring an unusually large number of on-off type perturbations (>25) for the  
237 OS and best TS processes. Interestingly, the compounds that were determined to have an unusually low  
238 yield in the previous section - 5-methylthioribose and spermidine have the largest number of upregulations  
239 among all the products. The yield of these products is likely low due to the upregulation of pathways

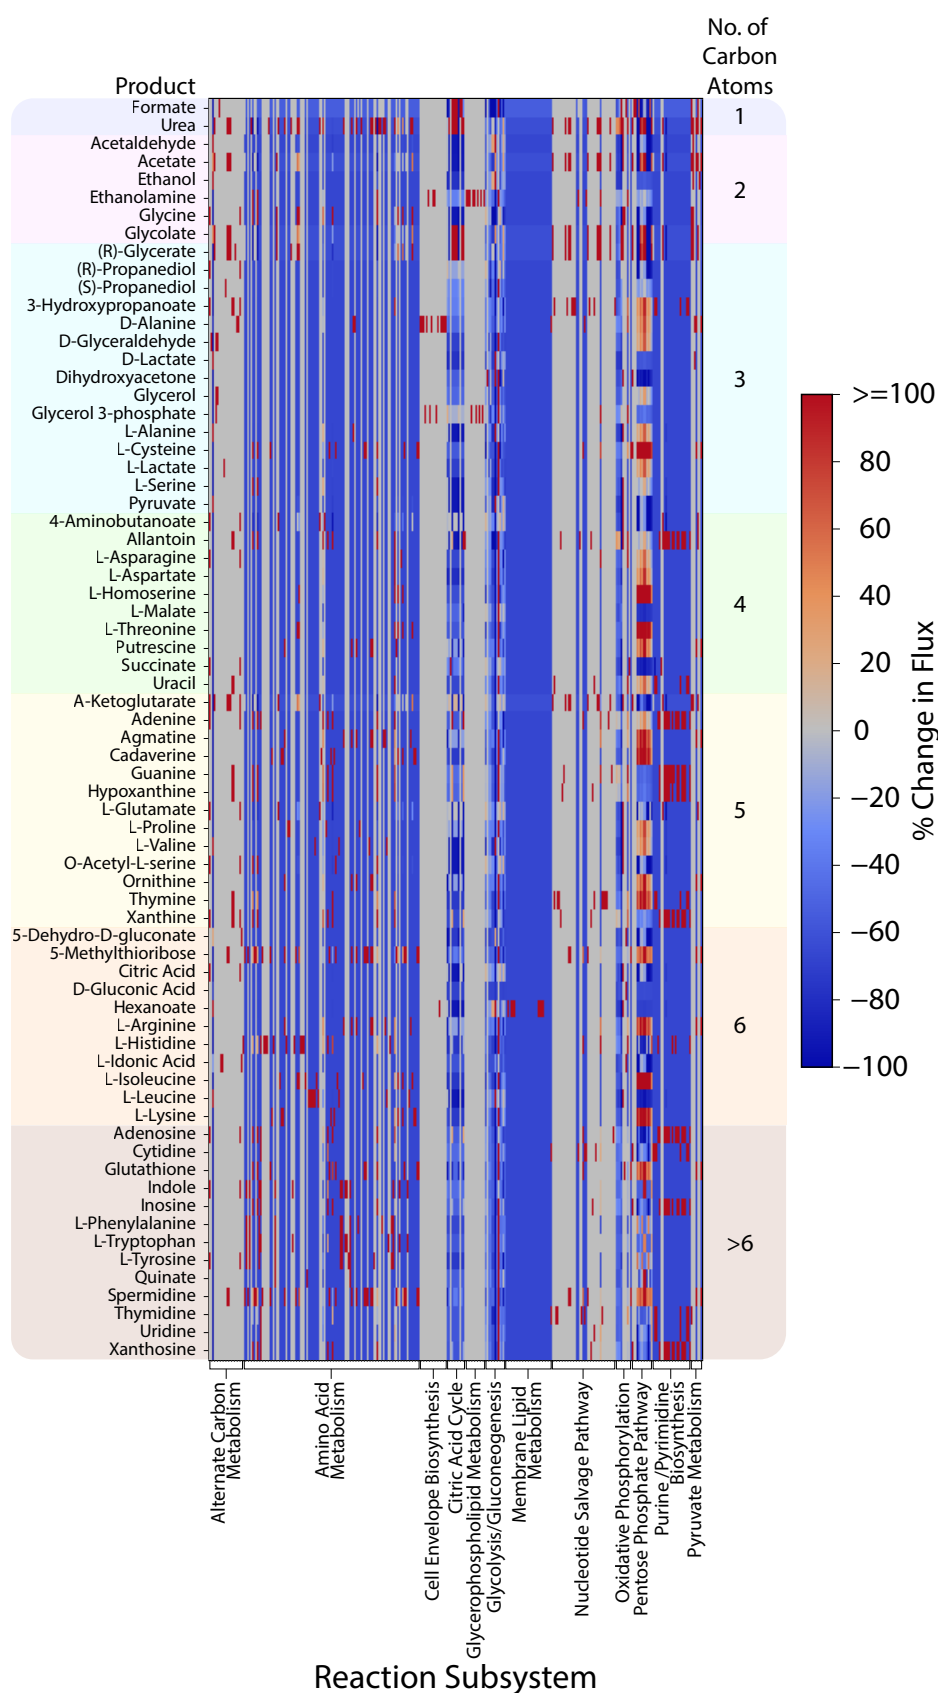

**Figure 5:** Flux perturbations required for best TS processes: Percent change in flux through all reactions compared to wild-type flux distribution required to achieve the best two-stage processes for native exchange metabolites in *E. coli*. Due to the large number of reactions involved, only the reaction subsystems are shown.

240 that result in yield losses during production and the absence of alternative pathways that conserve yield.  
241 All process types involve a large number of downregulations. However, the number of downregulations for  
242 the OS and best TS processes are very high while the number of reactions turned off is very high for the  
243 traditional TS processes.

244 To further understand the production phenotypes for each of the process types, we examined the  
245 magnitude of flux changes from the wild-type flux distribution for every product and arranged the reactions  
246 based on the subsystem in which they occur (Figure 5, Supplementary Figure S11). As noted previously,  
247 most perturbations for the best TS process are downregulations. It appears that the reactions which require  
248 downregulation are concentrated in specific subsystems. Notably, all reactions involved in membrane lipid  
249 metabolism are downregulated for all but one of the products. Similarly, many reactions involved in  
250 glycolysis, the citric acid cycle, amino acid metabolism and nucleotide biosynthesis are downregulated for  
251 most products. Not surprisingly, reactions involved in the production of biomass are downregulated for all  
252 products. The magnitude of flux changes is also very similar across the entire product range. Reactions in  
253 amino acid metabolism and nucleotide biosynthesis are upregulated/switched on only for the production  
254 of these products. Interestingly, reactions in the pentose phosphate pathway are equally divided between  
255 being upregulated or downregulated together for different products. Hence, this subsystem appears to  
256 act as a key node that controls precursor availability to manufacture metabolites within the cell. Also, it  
257 appears that the same fluxes need to be perturbed for the OS process as well, with the only difference being  
258 the magnitude of the flux change required (Supplementary Figure S11). These results suggest that it is  
259 possible to engineer an *E. coli* strain with a universal production phenotype that maximizes productivity,  
260 where flux perturbations that appear for all the products can be dynamically controlled and flux through  
261 them throttled to reduce the growth rate to a certain value. Then, depending on the class of product  
262 required - amino acid, nucleotide, central carbon metabolite, etc, those reactions that require upregulation  
263 can be dynamically expressed. Therefore, it could be possible to create productivity maximizing platform  
264 strains for each class of product.

### 265 **3.4 Perturbations increasing phosphoenolpyruvate and NADPH availability are en-** 266 **riched**

267 In order to identify key control reactions, we analyzed which reactions are enriched in production strategies  
268 for the exchange metabolites previously analyzed. We did this by looking at the number of products for  
269 which each reaction appeared as a perturbation and classified them based on the type of perturbation - on,  
270 off, upregulation, downregulation or reversal (Figure 6). Only non-transport reactions involved directly  
271 in metabolism were retained for the final analysis. The full names of reactions have been provided in  
272 supplementary table S1.

273 Among the reactions that are switched on for TS strategies (Figure 6), HEX1 (ATP dependent hex-  
274 okinase) occurs in more than half of the products. This reaction serves as an alternative to the phos-  
275 photransferase system that is used by wild-type *E. coli* to transport and phosphorylate glucose. Other  
276 modes of glucose phosphorylation such as the XYLI - HEX7 (Xylose isomerase - Hexokinase) system that  
277 converts glucose to fructose and then phosphorylates it, also appears in many products. These reactions  
278 differ from the conventional phosphotransferase system, in that they use ATP for phosphorylation as op-  
279 posed to phosphoenolpyruvate (PEP). PEP is a key precursor to many products and therefore, alternative

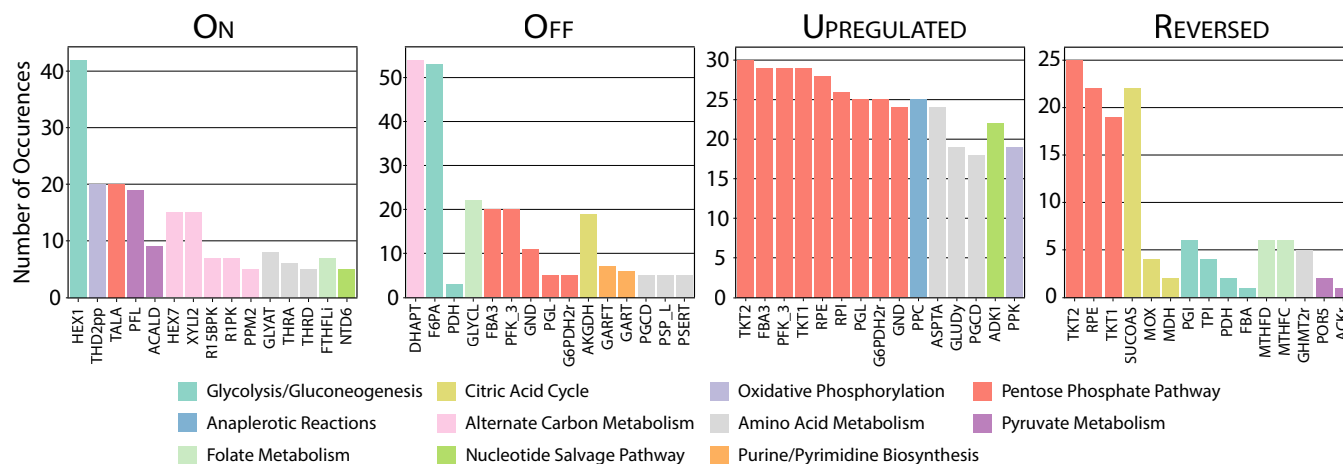

**Figure 6:** Key reactions in perturbations for best TS processes: Reactions most frequently occurring in the best two-stage production strategies for native exchange metabolites in *E. coli* were obtained and classified based on the type of perturbation.

280 means of glucose usage that use less PEP are enriched in the ‘on’ type perturbations. Consequently, the  
 281 HEX1 glucose transport system has previously been studied for its importance in creating platform strains  
 282 for microbial chemical production<sup>42</sup>. Furthermore, extra usage of ATP has been explored as a means to  
 283 increase substrate uptake rates, potentially increasing product flux under low growth conditions<sup>43</sup>, sug-  
 284 gesting the importance of studying alternatives to the native phosphotransferase system. The reaction  
 285 THD2pp (NADP transhydrogenase) is also required to be switched on for many products. This likely  
 286 serves to increase NADPH availability to cater to production pathways. Many reactions that need to be  
 287 switched on are concentrated in the alternate carbon metabolism subsystem.

288 Among other types of perturbations, DHAPT (Dihydroxyacetone phosphotransferase) and F6PA (Fruc-  
 289 tose 6-phosphate aldolase) are reactions that need to be turned off for most products. These also likely  
 290 serve to collectively increase PEP availability for production reactions since DHAPT utilizes PEP. Many  
 291 upregulated reactions are from the pentose phosphate pathway subsystem, serving to increase the avail-  
 292 ability of NADPH and pentose sugars for products. The transketolases and RPE (Ribulose 5-phosphate  
 293 epimerase) need to be reversed in direction for many of the products to cater to varying precursor require-  
 294 ments for different product classes. In summary, reactions from the pentose phosphate pathway occur  
 295 very frequently in the best TS strategies. Also, over 70% of the reactions involved in membrane lipid  
 296 metabolism, cofactor biosynthesis, lipopolysaccharide biosynthesis and glycerophospholipid metabolism,  
 297 which are used for biomass production need to be downregulated (Supplementary Figure S13).

298 The best OS and TS strategies have a lot of commonly required perturbations (Figure 6 and Supple-  
 299 mentary Figure S12). Notably, the PEP conserving strategies and the pentose phosphate pathway reactions  
 300 are enriched for either process type. This bolsters the importance of PEP as a key bow-tie metabolite in  
 301 making metabolism modular.

## 302 4 Conclusions

303 We have seen that the choice of process type influences the process metrics and therefore the profitability  
 304 of a microbial chemical production process to a great extent. Furthermore, strain design choices are also

305 influenced by process choice. One-stage processes require static genetic intervention strategies that couple  
306 growth and production whereas, TS processes require dynamic intervention strategies where gene expression  
307 is temporally controlled. Recent advances in CRISPR<sup>44</sup>, transcriptional switches<sup>45</sup>, riboswitches<sup>46</sup>, and  
308 other gene regulatory elements present an exciting outlook for the experimental implementation of such  
309 intervention strategies. There has also been interest in computational algorithms that predict dynamic  
310 control strategies which begin with high growth and switch over to growth-coupled production as required  
311 by the best TS production strategies predicted in this study<sup>47</sup>.

312 The flux perturbations necessary to achieve the target production phenotypes predicted for these strate-  
313 gies is daunting due to the sheer number of perturbations required. However, it is important to note that  
314 this analysis does not take into account the fact that many pathways are linear and sequential. Therefore,  
315 it would not be necessary to actively perturb all fluxes predicted in this study. A reduction of the metabolic  
316 network would help to identify key control reactions that actually need to be perturbed. Furthermore, al-  
317 gorithmic approaches can be used to predict the genetic perturbations required to achieve target phenotypes  
318 given the constraints predicted by TS-DySScO. Most reactions that need to be downregulated are those  
319 that direct flux towards biomass production. It is interesting to note that the production of most products  
320 involves enhancing PEP conserving and NADPH overproducing strategies. The emergence of PEP as a  
321 key precursor indicates its importance as a bow-tie metabolite, funneling flux into different pathways<sup>2,48</sup>.  
322 Furthermore, reactions in the pentose phosphate pathway seem to work in unison to increase precursor  
323 availability for number of products by being upregulated or downregulated, alluding to their importance in  
324 making metabolic networks malleable and robust to perturbations. These common features in strains with  
325 enhanced production of a wide range of metabolites give rise to the idea of a universal production strain  
326 that could be used to maximize productivity in a TS process by redirecting flux from growth to production  
327 related processes for various classes of products. Such a platform strain that maximizes productivity could  
328 be realized by placing a minimal number of control reactions under dynamically repressible/inducible pro-  
329 moters to throttle biomass production flux. This is similar to the concept of a modular cellular chassis for  
330 the production of many different compounds, that has gained interest recently<sup>49,50</sup>.

331 From our results, TS processes do seem to outperform OS processes in terms of productivity for native  
332 exchange metabolites in *E. coli*, and since the production characteristics can be expected to be similar for  
333 other organisms and non-native products too, this conclusion can be extended to products in other hosts  
334 as well. We found that this conclusion holds true over a wide range of industrially relevant fermentation  
335 start parameters. The overall yield and end-titer of such a TS process is also higher than an OS process  
336 selected for high productivity. However, the model for substrate uptake rate variation used in this study  
337 is only an approximation. In future, better substrate uptake rate measurements for combinatorial deletion  
338 mutants will help in making more accurate predictions of process performance. While it is true that the  
339 process metrics depend on the substrate uptake rate of the mutant strain, we have shown that a TS process  
340 can outperform an OS process at every production phenotype, regardless of substrate uptake rate. Further  
341 improvements in substrate uptake rates through various strategies<sup>51</sup> will improve productivity even further.  
342 The software framework presented here - TS-DySScO, has the ability to determine the effectiveness of each  
343 process type and predict optimal hypothetical phenotypes for experimental evaluation. It also provides  
344 information about the fermentation conditions under which each process type would perform better. We  
345 anticipate that TS-DySScO and the findings obtained in this study will be very valuable to make process

346 and strain design decisions for industrial scale production of chemicals using microorganisms. Furthermore,  
347 the concept of a universal production strain that has the same growth phenotype and several common flux  
348 perturbations required to switch on the production of many chemicals in a flexible manner may provide a  
349 paradigm shift in the way chemical production processes are designed in the future.

## 350 Acknowledgements

351 This work was supported by the Natural Sciences and Engineering Research Council (NSERC), the NSERC  
352 Industrial Biocatalysis Network, the Ontario Ministry of Research and Innovation, and Genome Canada.

## 353 References

- 354 [1] E. Ravasz, A. L. Somera, D. A. Mongru, Z. N. Oltvai, and A.-L. Barabási. Hierarchical organization  
355 of modularity in metabolic networks. *Science*, 297(5586):1551–1555, 2002.
- 356 [2] Tamar Friedlander, Avraham E. Mayo, Tsvi Tlusty, and Uri Alon. Evolution of bow-tie architectures  
357 in biology. *PLOS Computational Biology*, 11(3):1–19, 03 2015.
- 358 [3] Kayla Nembr, Jonas E.N. Müller, Jeong Chan Joo, Pratish Gawand, Ruhi Choudhary, Burton Men-  
359 donca, Shuyi Lu, Xiuyan Yu, Alexander F. Yakunin, and Radhakrishnan Mahadevan. Engineering a  
360 short, aldolase-based pathway for (R)-1,3-butanediol production in *Escherichia coli*. *Metabolic Engi-  
361 neering*, 48:13 – 24, 2018.
- 362 [4] Kaushik Raj, Siavash Partow, Kevin Correia, Anna N. Khusnutdinova, Alexander F. Yakunin, and  
363 Radhakrishnan Mahadevan. Biocatalytic production of adipic acid from glucose using engineered  
364 *Saccharomyces cerevisiae*. *Metabolic Engineering Communications*, 6:28 – 32, 2018.
- 365 [5] Stephanie Galanie, Kate Thodey, Isis J. Trenchard, Maria Filsinger Interrante, and Christina D.  
366 Smolke. Complete biosynthesis of opioids in yeast. *Science*, 349(6252):1095–1100, 2015.
- 367 [6] Yanran Li, Sijin Li, Kate Thodey, Isis Trenchard, Aaron Cravens, and Christina D. Smolke. Complete  
368 biosynthesis of noscapine and halogenated alkaloids in yeast. *Proceedings of the National Academy of  
369 Sciences*, 115(17):E3922–E3931, 2018.
- 370 [7] Weerawat Runguphan and Jay D. Keasling. Metabolic engineering of *saccharomyces cerevisiae* for  
371 production of fatty acid-derived biofuels and chemicals. *Metabolic Engineering*, 21:103 – 113, 2014.
- 372 [8] Andreas Schirmer, Mathew A. Rude, Xuezhi Li, Emanuela Popova, and Stephen B. del Cardayre.  
373 Microbial biosynthesis of alkanes. *Science*, 329(5991):559–562, 2010.
- 374 [9] Sang Yup Lee, Hyun Uk Kim, Tong Un Chae, Jae Sung Cho, Je Woong Kim, Jae Ho Shin, Dong In  
375 Kim, Yoo-Sung Ko, Woo Dae Jang, and Yu-Sin Jang. A comprehensive metabolic map for production  
376 of bio-based chemicals. *Nature Catalysis*, 2(1):18–33, jan 2019.
- 377 [10] Anthony Burgard, Mark J. Burk, Robin Osterhout, Stephen Van Dien, and Harry Yim. Develop-  
378 ment of a commercial scale process for production of 1,4-butanediol from sugar. *Current Opinion in  
379 Biotechnology*, 42:118 – 125, 2016.

- 380 [11] C J Paddon, P J Westfall, D J Pitera, K Benjamin, K Fisher, D McPhee, M D Leavell, a Tai, a Main,  
381 D Eng, D R Polichuk, K H Teoh, D W Reed, T Treynor, J Lenihan, M Fleck, S Bajad, G Dang,  
382 D Dengrove, D Diola, G Dorin, K W Ellens, S Fickes, J Galazzo, S P Gaucher, T Geistlinger, R Henry,  
383 M Hepp, T Horning, T Iqbal, H Jiang, L Kizer, B Lieu, D Melis, N Moss, R Regentin, S Secrest,  
384 H Tsuruta, R Vazquez, L F Westblade, L Xu, M Yu, Y Zhang, L Zhao, J Lievense, P S Covello, J D  
385 Keasling, K K Reiling, N S Renninger, and J D Newman. High-level semi-synthetic production of the  
386 potent antimalarial artemisinin. *Nature*, 496(7446):528–532, apr 2013.
- 387 [12] David Julleson, Florian David, Brian Pflieger, and Jens Nielsen. Impact of synthetic biology and  
388 metabolic engineering on industrial production of fine chemicals. *Biotechnology Advances*, 33(7):1395  
389 – 1402, 2015.
- 390 [13] Nelson R. Barton, Anthony P. Burgard, Mark J. Burk, Jason S. Crater, Robin E. Osterhout, Priti  
391 Pharkya, Brian A. Steer, Jun Sun, John D. Trawick, Stephen J. Van Dien, Tae Hoon Yang, and Harry  
392 Yim. An integrated biotechnology platform for developing sustainable chemical processes. *Journal of*  
393 *Industrial Microbiology & Biotechnology*, 42(3):349–360, Mar 2015.
- 394 [14] Sang Yup Lee and Hyun Uk Kim. Systems strategies for developing industrial microbial strains.  
395 *Nature Biotechnology*, 33(10):1061–1072, 2015.
- 396 [15] Stephen Van Dien. From the first drop to the first truckload: commercialization of microbial processes  
397 for renewable chemicals. *Current Opinion in Biotechnology*, 24(6):1061 – 1068, 2013.
- 398 [16] Jens Nielsen and Jay D. Keasling. Engineering cellular metabolism. *Cell*, 164(6):1185 – 1197, 2016.
- 399 [17] Jeremy S. Edwards, Rafael U. Ibarra, and Bernhard O. Palsson. In silico predictions of Escherichia coli  
400 metabolic capabilities are consistent with experimental data. *Nature Biotechnology*, 19(2):125–130,  
401 feb 2001.
- 402 [18] Steffen Klamt and Radhakrishnan Mahadevan. On the feasibility of growth-coupled product synthesis  
403 in microbial strains. *Metabolic Engineering*, 30:166–178, 2015.
- 404 [19] Naveen Venayak, Kaushik Raj, Rohil Jaydeep, and Radhakrishnan Mahadevan. An optimized bistable  
405 metabolic switch to decouple phenotypic states during anaerobic fermentation. *ACS Synthetic Biology*,  
406 7(12):2854–2866, 2018.
- 407 [20] Apoorv Gupta, Irene M Brockman Reizman, Christopher R Reisch, and Kristala L J Prather. Dy-  
408 namic regulation of metabolic flux in engineered bacteria using a pathway-independent quorum-sensing  
409 circuit. *Nature Biotechnology*, 35(3):273–279, 2017.
- 410 [21] Peng Xu, Lingyun Li, Fuming Zhang, Gregory Stephanopoulos, and Mattheos Koffas. Improving fatty  
411 acids production by engineering dynamic pathway regulation and metabolic control. *Proceedings of*  
412 *the National Academy of Sciences*, 111(31):11299–11304, 2014.
- 413 [22] Nikolaos Anesiadis, William R. Cluett, and Radhakrishnan Mahadevan. Dynamic metabolic engineer-  
414 ing for increasing bioprocess productivity. *Metabolic Engineering*, 10(5):255–266, 2008.



- 415 [23] Naveen Venayak, Nikolaos Anesiadis, William R. Cluett, and Radhakrishnan Mahadevan. Engineering  
416 metabolism through dynamic control. *Current Opinion in Biotechnology*, 34:142–152, 2015.
- 417 [24] Victor Chubukov and Uwe Sauer. Environmental dependence of stationary-phase metabolism in  
418 bacillus subtilis and escherichia coli. *Applied and Environmental Microbiology*, 80(9):2901–2909, 2014.
- 419 [25] Markus W. Covert, Eric M. Knight, Jennifer L. Reed, Markus J. Herrgård, and Bernhard O. Palsson.  
420 Integrating high-throughput and computational data elucidates bacterial networks. *Nature*, 429:92–96,  
421 2004.
- 422 [26] Eliane Fischer, Nicola Zamboni, and Uwe Sauer. High-throughput metabolic flux analysis based on  
423 gas chromatography–mass spectrometry derived <sup>13</sup>C constraints. *Analytical Biochemistry*, 325(2):308–  
424 316, 2004.
- 425 [27] Uwe Sauer, Fabrizio Canonaco, Sylvia Heri, Annik Perrenoud, and Eliane Fischer. The Soluble  
426 and Membrane-bound Transhydrogenases UdhA and PntAB Have Divergent Functions in NADPH  
427 Metabolism of *Escherichia coli*. *Journal of Biological Chemistry*, 279(8):6613–6619, 2004.
- 428 [28] Annik Perrenoud and Uwe Sauer. Impact of global transcriptional regulation by arca, arcb, cra, crp,  
429 cya, fnr, and mlc on glucose catabolism in *Escherichia coli*. *Journal of Bacteriology*, 187(9):3171–3179,  
430 2005.
- 431 [29] Stephen S Fong, Annik Nanchen, Bernhard O Palsson, and Uwe Sauer. Latent pathway activation  
432 and increased pathway capacity enable *Escherichia coli* adaptation to loss of key metabolic enzymes.  
433 *The Journal of biological chemistry*, 281(12):8024–33, 2006.
- 434 [30] Bart R B Haverkorn van Rijsewijk, Annik Nanchen, Sophie Nallet, Roelco J Kleijn, and Uwe Sauer.  
435 Large-scale <sup>13</sup>c-flux analysis reveals distinct transcriptional control of respiratory and fermentative  
436 metabolism in *Escherichia coli*. *Molecular Systems Biology*, 7(1):477, 2011.
- 437 [31] Steffen Klamt, Radhakrishnan Mahadevan, and Oliver Hädicke. When do two-stage processes outper-  
438 form one-stage processes? *Biotechnology Journal*, 13(2):1700539, 2018.
- 439 [32] Kai Zhuang, Laurence Yang, William R Cluett, and Radhakrishnan Mahadevan. Dynamic strain  
440 scanning optimization: an efficient strain design strategy for balanced yield, titer, and productivity.  
441 DySScO strategy for strain design. *BMC biotechnology*, 13(1):8, jan 2013.
- 442 [33] Annik Nanchen, Alexander Schicker, and Uwe Sauer. Nonlinear dependency of intracellular fluxes  
443 on growth rate in miniaturized continuous cultures of *Escherichia coli*. *Applied and Environmental*  
444 *Microbiology*, 72(2):1164–1172, 2006.
- 445 [34] Nobuyoshi Ishii, Kenji Nakahigashi, Tomoya Baba, Martin Robert, Tomoyoshi Soga, Akio Kanai,  
446 Takashi Hirasawa, Miki Naba, Kenta Hirai, Aminul Hoque, Pei Yee Ho, Yuji Kakazu, Kaori Sugawara,  
447 Saori Igarashi, Satoshi Harada, Takeshi Masuda, Naoyuki Sugiyama, Takashi Togashi, Miki Hasegawa,  
448 Yuki Takai, Katsuyuki Yugi, Kazuharu Arakawa, Nayuta Iwata, Yoshihiro Toya, Yoichi Nakayama,  
449 Takaaki Nishioka, Kazuyuki Shimizu, Hirotada Mori, and Masaru Tomita. Multiple high-throughput  
450 analyses monitor the response of e. coli to perturbations. *Science*, 316(5824):593–597, 2007.

- 451 [35] Anke Kayser, Jan Weber, Volker Hecht, and Ursula Rinas. Metabolic flux analysis of *Escherichia coli*  
452 in glucose-limited continuous culture. i. growth-rate-dependent metabolic efficiency at steady state.  
453 *Microbiology*, 151(3):693–706, 2005.
- 454 [36] Annik Nanchen, Alexander Schicker, Olga Revelles, and Uwe Sauer. Cyclic amp-dependent catabo-  
455 lite repression is the dominant control mechanism of metabolic fluxes under glucose limitation in  
456 *Escherichia coli*. *Journal of Bacteriology*, 190(7):2323–2330, 2008.
- 457 [37] Radhakrishnan Mahadevan, Jeremy S. Edwards, and Francis J. Doyle. Dynamic flux balance analysis  
458 of diauxic growth in *Escherichia coli*. *Biophysical Journal*, 83(3):1331 – 1340, 2002.
- 459 [38] Ali Ebrahim, Joshua A Lerman, Bernhard O Palsson, and Daniel R Hyde. COBRApy: COstraints-  
460 Based Reconstruction and Analysis for Python. *BMC Systems Biology*, 7(1):74, 2013.
- 461 [39] João G. R. Cardoso, Kristian Jensen, Christian Lieven, Anne Sofie Lærke Hansen, Svetlana Galkina,  
462 Moritz Beber, Emre Özdemir, Markus J. Herrgård, Henning Redestig, and Nikolaus Sonnenschein.  
463 Cameo: A python library for computer aided metabolic engineering and optimization of cell factories.  
464 *ACS Synthetic Biology*, 7(4):1163–1166, 2018.
- 465 [40] Jeffrey D Orth, Tom M Conrad, Jessica Na, Joshua a Lerman, Hojung Nam, Adam M Feist, and  
466 Bernhard Ø Palsson. A comprehensive genome-scale reconstruction of *Escherichia coli* metabolism–  
467 2011. *Molecular systems biology*, 7(535):535, 2011.
- 468 [41] Nathan E Lewis, Kim K Hixson, Tom M Conrad, Joshua A Lerman, Pep Charusanti, Ashoka D  
469 Polpitiya, Joshua N Adkins, Gunnar Schramm, Samuel O Purvine, Daniel Lopez-Ferrer, Karl K Weitz,  
470 Roland Eils, Rainer König, Richard D Smith, and Bernhard Ø Palsson. Omic data from evolved e. coli  
471 are consistent with computed optimal growth from genome-scale models. *Molecular Systems Biology*,  
472 6(1):390, 2010.
- 473 [42] Verónica Hernández-Montalvo, Alfredo Martínez, Georgina Hernández-Chavez, Francisco Bolivar, Fer-  
474 nando Valle, and Guillermo Gosset. Expression of galp and glk in a *Escherichia coli* pts mutant  
475 restores glucose transport and increases glycolytic flux to fermentation products. *Biotechnology and*  
476 *Bioengineering*, 83(6):687–694, 2003.
- 477 [43] Simon Boecker, Ahmed Zahoor, Thorben Schramm, Hannes Link, and Steffen Klant. Broadening the  
478 scope of enforced atp wasting as a tool for metabolic engineering in escherichia coli. *Biotechnology*  
479 *Journal*, 14(9):1800438, 2019.
- 480 [44] Alexander C. Reis, Sean M. Halper, Grace E. Vezeau, Daniel P. Cetnar, Ayaan Hossain, Phillip R.  
481 Clauer, and Howard M. Salis. Simultaneous repression of multiple bacterial genes using nonrepetitive  
482 extra-long sgRNA arrays. *Nature Biotechnology*, pages 1–8, oct 2019.
- 483 [45] Jeong Wook Lee, Andras Gyorgy, D. Ewen Cameron, Nora Pyenson, Kyeong Rok Choi, Jeffrey C.  
484 Way, Pamela A. Silver, Domitilla Del Vecchio, and James J. Collins. Creating Single-Copy Genetic  
485 Circuits. *Molecular Cell*, 63(2):329–336, jul 2016.

- 486 [46] Abigail N. Leistra, Nicholas C. Curtis, and Lydia M. Contreras. Regulatory non-coding sRNAs in  
487 bacterial metabolic pathway engineering. *Metabolic Engineering*, 52:190–214, mar 2019.
- 488 [47] Naveen Venayak, Axel von Kamp, Steffen Klamt, and Radhakrishnan Mahadevan. MoVE identifies  
489 metabolic valves to switch between phenotypic states. *Nature Communications*, 9(1):5332, 2018.
- 490 [48] Jing Zhao, Hong Yu, Jian-Hua Luo, Zhi-Wei Cao, and Yi-Xue Li. Hierarchical modularity of nested  
491 bow-ties in metabolic networks. *BMC Bioinformatics*, 7(1):386, aug 2006.
- 492 [49] Sergio Garcia and Cong T. Trinh. Multiobjective strain design: A framework for modular cell engi-  
493 neering. *Metabolic Engineering*, 51:110 – 120, 2019.
- 494 [50] Brandon Wilbanks, Donovan S. Layton, Sergio Garcia, and Cong T. Trinh. A prototype for modular  
495 cell engineering. *ACS Synthetic Biology*, 7(1):187–199, 2018.
- 496 [51] Qiang Yan and Stephen S Fong. Increasing carbon source uptake rates to improve chemical produc-  
497 tivity in metabolic engineering. *Current Opinion in Biotechnology*, 53:254 – 263, 2018.
